# Supplementary material for: The impact of short-course total neoadjuvant therapy, long-course chemoradiotherapy, and upfront surgery on the technical difficulty of total mesorectal excision: an observational study with an intraoperative perspective
Source: PubMed Central journal article supplement — Ann Coloproctol. 2024 Sep 19;40(5):451–8. doi: 10.3393/ac.2023.00899.0128 (PMC11532385; doi:10.3393/ac.2023.00899.0128), 2024-09-19
Supplement: ac-2023-00899-0128-Supplementary-Fig-1.pdf [file ac-2023-00899-0128-Supplementary-Fig-1.pdf]

Thank you for your participation in the study. Your time spent is much appreciated. Please retain the thumb drive as a token of our appreciation.

| IDENTITY |      |                                                                      |  |                        |   |                                    |
|----------|------|----------------------------------------------------------------------|--|------------------------|---|------------------------------------|
|          |      | Please drag the dark grey slider to the level of difficulty for TME. |  | Please fill the boxes. |   |                                    |
| VIDEO    | EASY | LEVEL OF DIFFICULTY                                                  |  | DIFFICULT              |   | WHAT DO YOU THINK THE PATIENT HAD? |
| A        | <    |                                                                      |  |                        | > | Upfront                            |
| B        | <    |                                                                      |  |                        | > | Long Course                        |
| C        | <    |                                                                      |  |                        | > |                                    |
| D        | <    |                                                                      |  |                        | > |                                    |
| E        | <    |                                                                      |  |                        | > |                                    |
| F        | <    |                                                                      |  |                        | > | RAPIDO                             |
| G        | <    |                                                                      |  |                        | > |                                    |
| H        | <    |                                                                      |  |                        | > |                                    |
| I        | <    |                                                                      |  |                        | > |                                    |
| J        | <    |                                                                      |  |                        | > |                                    |
| K        | <    |                                                                      |  |                        | > |                                    |
| L        | <    |                                                                      |  |                        | > |                                    |

Supplementary Fig. 1. Assessor form.
