# Supplementary material for: The impact of short-course total neoadjuvant therapy, long-course chemoradiotherapy, and upfront surgery on the technical difficulty of total mesorectal excision: an observational study with an intraoperative perspective
Source: PubMed Central journal article supplement — Ann Coloproctol. 2024 Sep 19;40(5):451–8. doi: 10.3393/ac.2023.00899.0128 (PMC11532385; doi:10.3393/ac.2023.00899.0128), 2024-09-19
Supplement: ac-2023-00899-0128-Supplementary-Table-1.pdf [file ac-2023-00899-0128-Supplementary-Table-1.pdf]

**Supplementary Table 1.** LAP-VEGaS video assessment tool

| Item description                                                                                                                                                                                | Not presented (0)                   | Presented partially (+1)            | Presented, completely (+2)          | Remarks/reasons                                                                                                                                                                                                                                                  |
|-------------------------------------------------------------------------------------------------------------------------------------------------------------------------------------------------|-------------------------------------|-------------------------------------|-------------------------------------|------------------------------------------------------------------------------------------------------------------------------------------------------------------------------------------------------------------------------------------------------------------|
| 1. Authors and institution information. Title of the video including name of procedure and pathology treated.                                                                                   | <input checked="" type="checkbox"/> | <input type="checkbox"/>            | <input type="checkbox"/>            | Videos were deidentified to blind reviewers on the surgeon performing the surgery to prevent reviewer bias.                                                                                                                                                      |
| 2. Formal presentation of the case, including patient details and imaging, indication for surgery, comorbidities and previous surgery. Patient anonymity is maintained.                         | <input checked="" type="checkbox"/> | <input type="checkbox"/>            | <input type="checkbox"/>            | Only cases with rectal cancer were included in this study; no background information was provided to prevent reviewer bias.                                                                                                                                      |
| 3. Position of patient, access ports, extraction site and surgical team.                                                                                                                        | <input checked="" type="checkbox"/> | <input type="checkbox"/>            | <input type="checkbox"/>            | All the procedures were laparoscopic TME, thus this was not covered in the video.                                                                                                                                                                                |
| 4. The surgical procedure is presented in a standardized step by step fashion.                                                                                                                  | <input type="checkbox"/>            | <input checked="" type="checkbox"/> | <input type="checkbox"/>            | Select steps were covered in the video: mobilization of rectum with TME, distal transection and formation of end-to-end colorectal anastomosis. These steps were identified as the most challenging after neoadjuvant therapy; thus, the video focused on these. |
| 5. The intraoperative findings are clearly demonstrated, with constant reference to the anatomy.                                                                                                | <input type="checkbox"/>            | <input checked="" type="checkbox"/> | <input type="checkbox"/>            |                                                                                                                                                                                                                                                                  |
| 6. Relevant outcomes of the procedure are presented, including operating time, postoperative morbidity and histology when appropriate.                                                          | <input checked="" type="checkbox"/> | <input type="checkbox"/>            | <input type="checkbox"/>            | Not covered to prevent any reviewer bias on assessment of technical difficulty.                                                                                                                                                                                  |
| 7. Additional graphic aid is included such as diagrams, snapshots and photos to demonstrate anatomical landmarks, relevant or unexpected finding, or to present additional educational content. | <input checked="" type="checkbox"/> | <input type="checkbox"/>            | <input type="checkbox"/>            | Reviewers were all practicing colorectal surgeons; thus, these were not included in the videos.                                                                                                                                                                  |
| 8. Audio/written commentary in English language is provided.                                                                                                                                    | <input checked="" type="checkbox"/> | <input type="checkbox"/>            | <input type="checkbox"/>            |                                                                                                                                                                                                                                                                  |
| 9. The image quality is appropriate with constant clear view of the operating field. The video is fluent with appropriate speed.                                                                | <input type="checkbox"/>            | <input type="checkbox"/>            | <input checked="" type="checkbox"/> | All videos were 4K at 2 times speed, and the select steps were included at full length/duration.                                                                                                                                                                 |

LAP-VEGaS, Laparoscopic Surgery Video Educational Guidelines; TME, total mesorectal excision.
