# Supplementary material for: The impact of short-course total neoadjuvant therapy, long-course chemoradiotherapy, and upfront surgery on the technical difficulty of total mesorectal excision: an observational study with an intraoperative perspective
Source: PubMed Central journal article supplement — Ann Coloproctol. 2024 Sep 19;40(5):451–8. doi: 10.3393/ac.2023.00899.0128 (PMC11532385; doi:10.3393/ac.2023.00899.0128), 2024-09-19
Supplement: ac-2023-00899-0128-Supplementary-Table-2.pdf [file ac-2023-00899-0128-Supplementary-Table-2.pdf]

**Supplementary Table 2.** Correlation of visual analog scale for videos

| Video | Pearson coefficient | P-value |
|-------|---------------------|---------|
| A     | -0.05               | 0.92    |
| B     | -0.13               | 0.78    |
| C     | -2.05               | > 0.99  |
| D     | -0.46               | 0.30    |
| E     | 0.11                | 0.82    |
| F     | 0.27                | 0.56    |
| G     | 0.77                | 0.04    |
| H     | 0.34                | 0.46    |
| I     | 0.36                | 0.43    |
| J     | 0.78                | 0.04    |
| K     | 0.79                | 0.03    |
| L     | 0.53                | 0.22    |
